# Supplementary material
Source: publisher site journal article supplement (https://www.dovepress.com/article/supplementary_file/559080/Supporting%20Information%2020251124.docx)
Supplement: Supplementary file 1 [file Supporting%20Information%2020251124.docx]

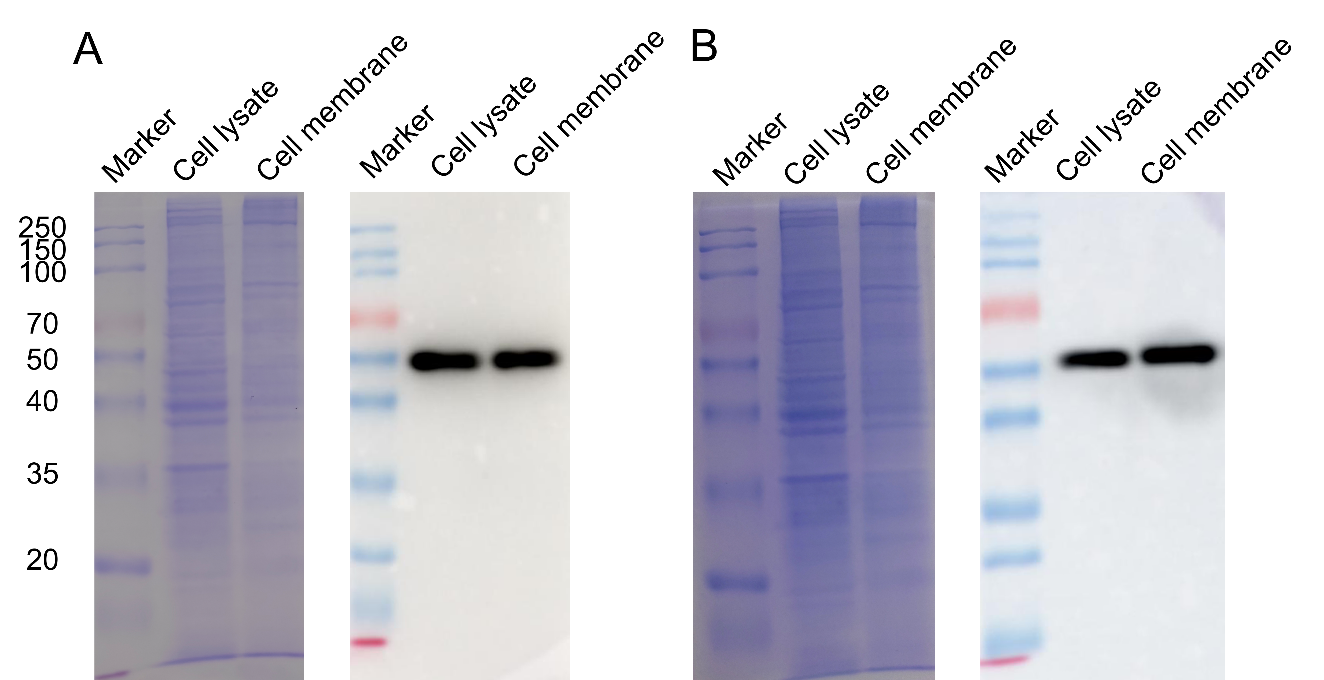


**Figure S1** SDS-PAGE (left) and western blot analysis of CD47 (right) performed on cell lysates and isolated cell membranes from 4T1 (A) and MDA-MB-231 (B) cells.


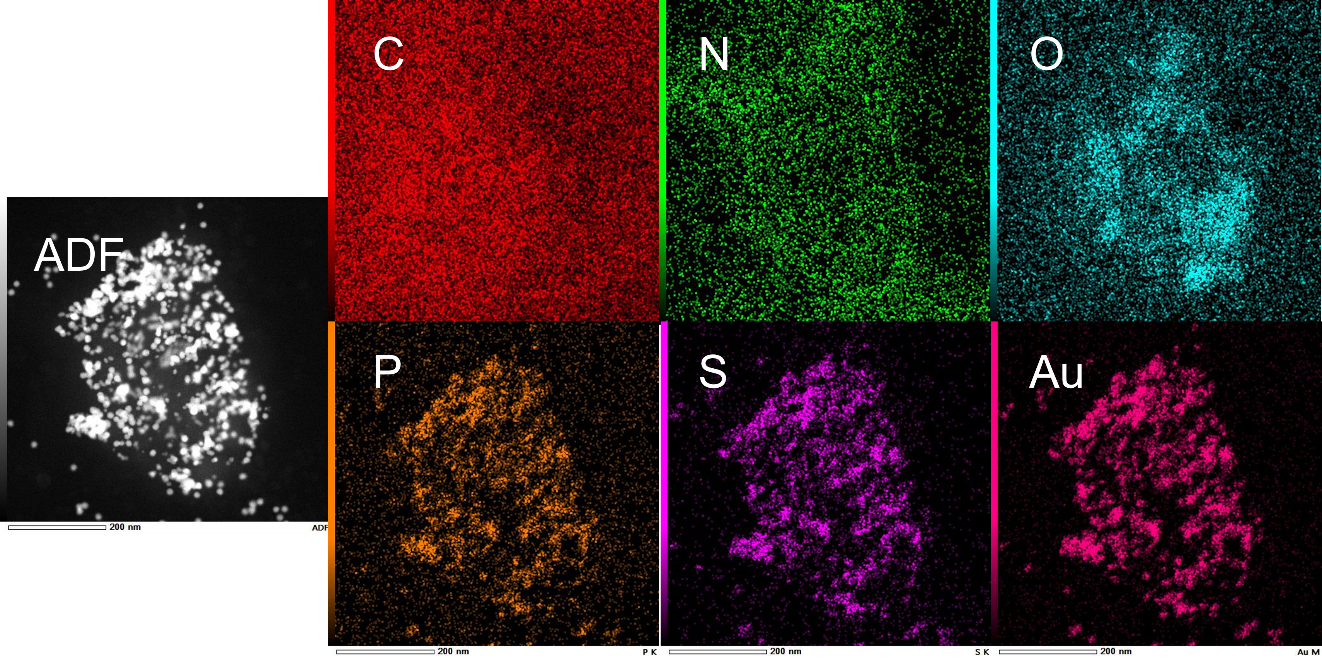


**Figure S2** EDS revealed the elemental composition of M@DOX@AuNPs.


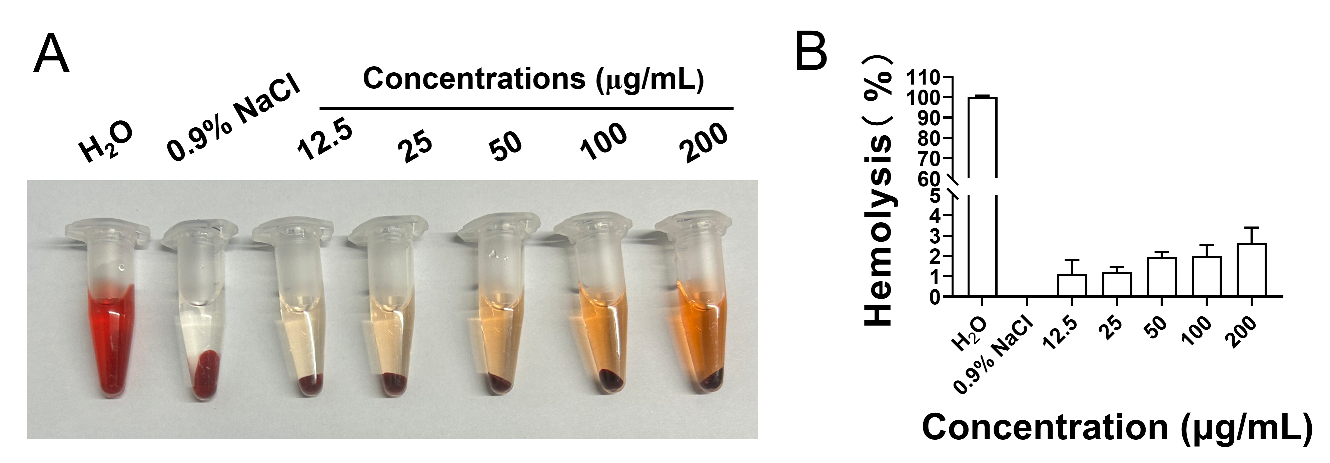


**Figure S3** (A) Hemolysis photos and (B) rate (%) of RBCs after incubation with different concentrations of M@DOX@AuNPs


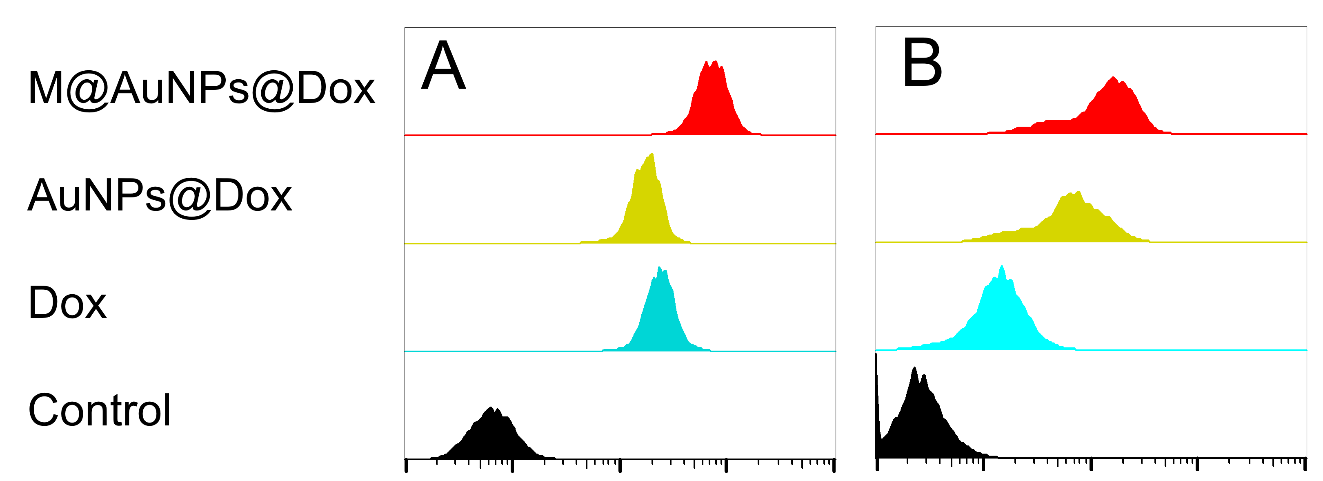


**Figure S4** *In vitro* cellular uptake efficiency of M@DOX@AuNPs in (A) 4T1 cells and (B) MDA-MB-231 cells as assessed by flow cytometry.


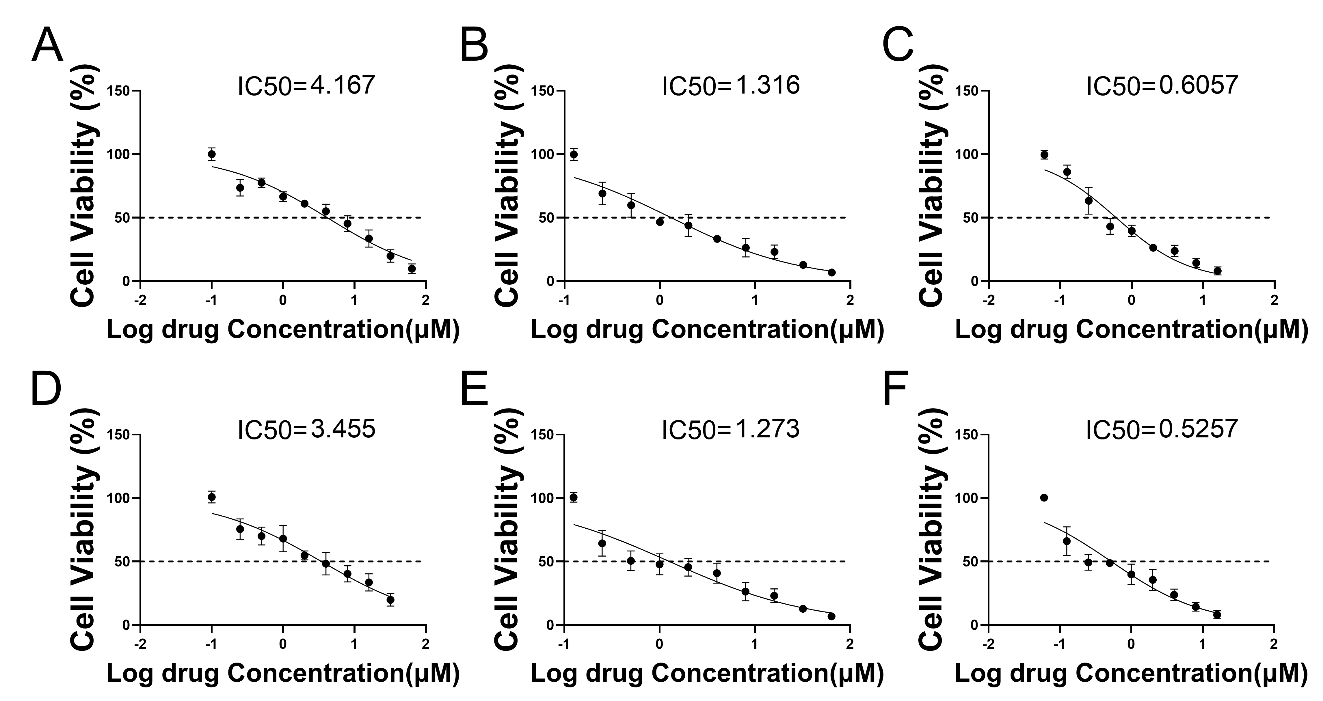


**Figure S5** IC50 values of DOX (A, D), DOX@AuNPs (B, E) and M@DOX@AuNPs (C, F) against 4T1 (A, B, C) and MDA-MB-231 (E, F, G) cells.

**
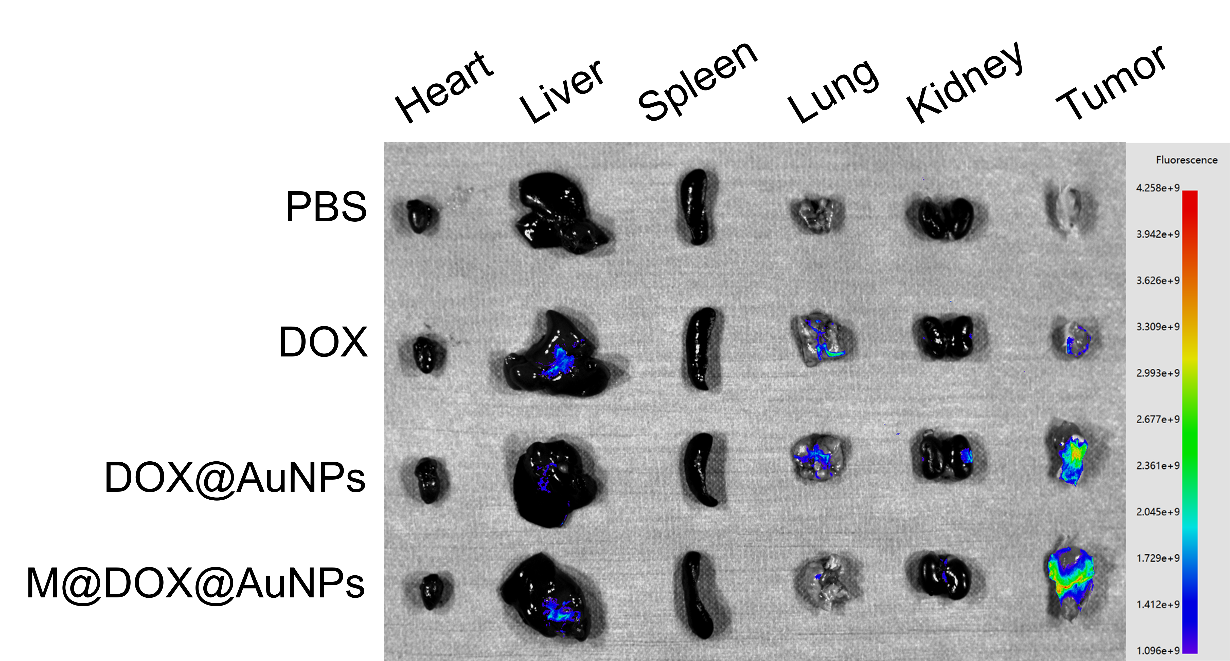
**

**Figure S6** Ex vivo fluorescence imaging of major organs and tumor tissues following administration of PBS, DOX, DOX@AuNPs or M@DOX@AuNPs.


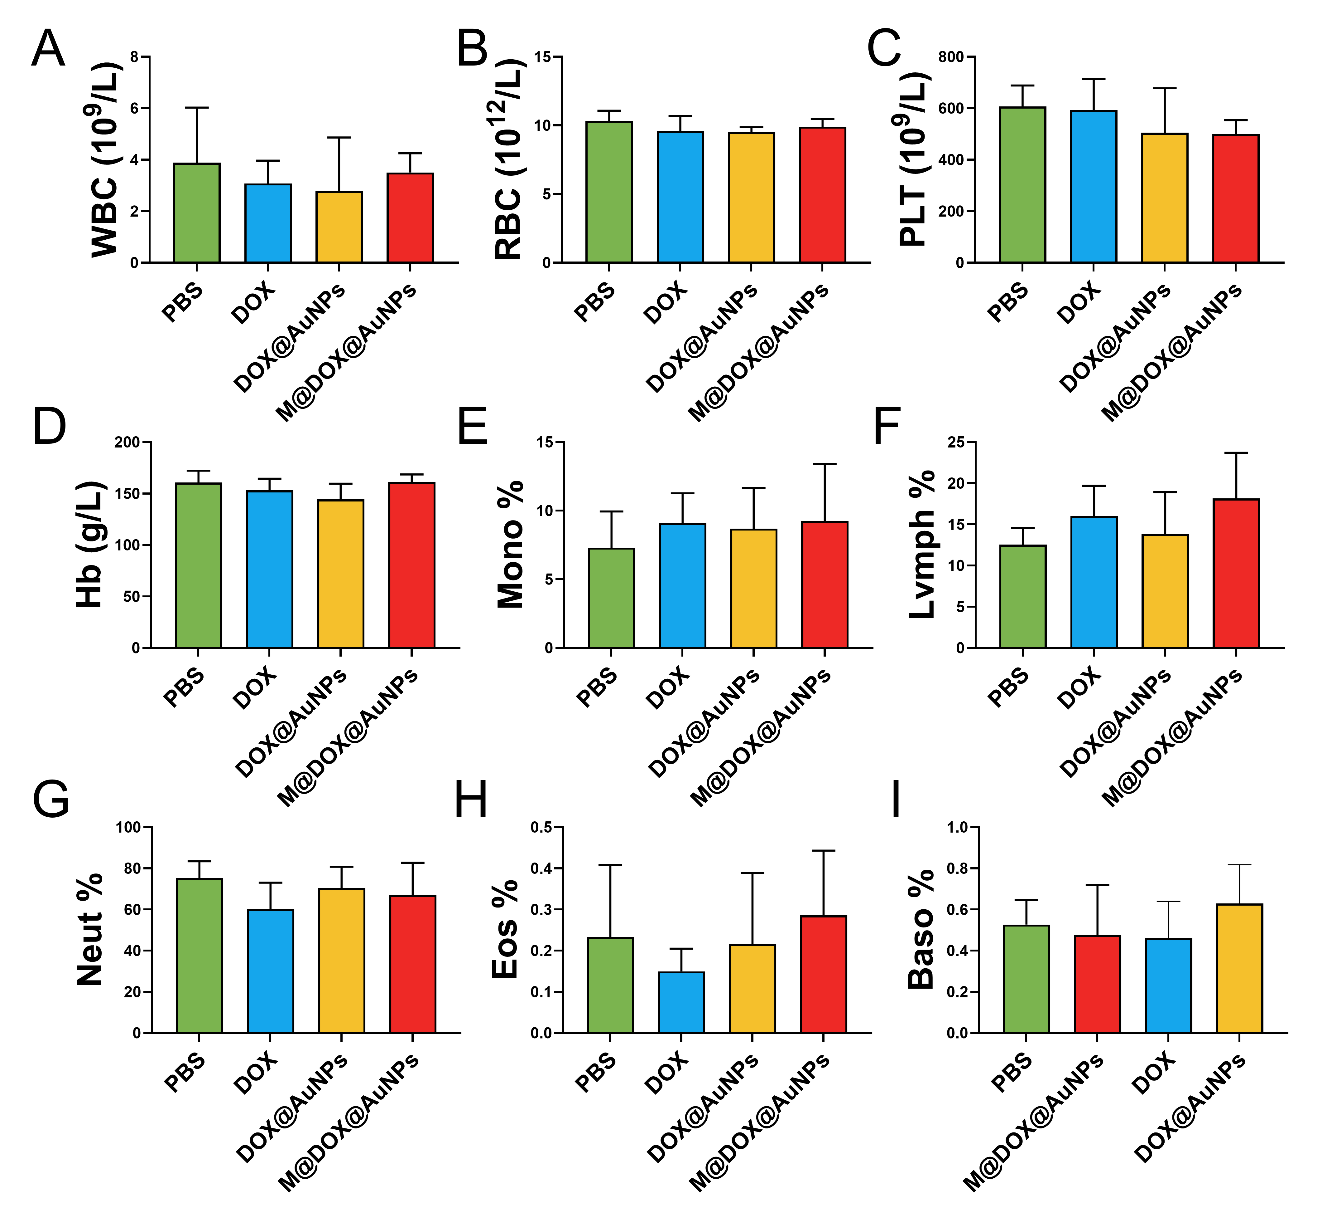


**Figure S7** Blood cell counts and immune cell composition in mice subjected to different treatment.


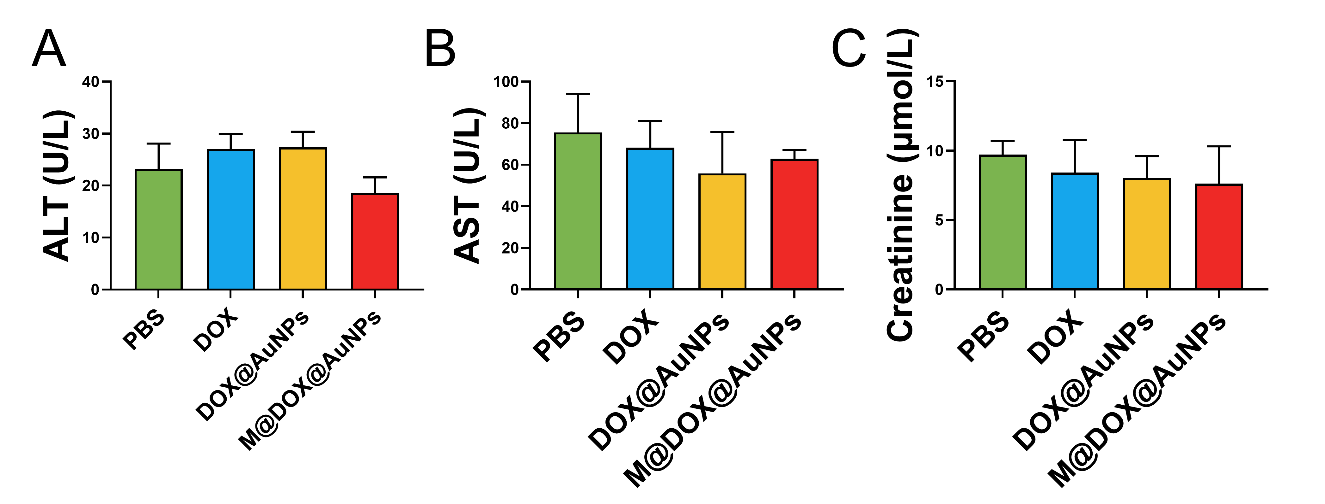


**Figure S8** Liver and kidney injury markers in differently treated mice.
